# Supplementary material for: SF3B1/Hsh155 HEAT motif mutations affect interaction with the spliceosomal ATPase Prp5, resulting in altered branch site selectivity in pre-mRNA splicing
Source: PubMed Central journal article supplement — Genes Dev. 2016 Dec 15;30(24):2710–23. doi: 10.1101/gad.291872.116 (PMC5238730; doi:10.1101/gad.291872.116), 2016-12-15
Supplement: supp_30.24.2710_Supplemental_Material.pdf [file supp_30.24.2710_Supplemental_Material.pdf]

## Supplemental Material

### Figure S1. Alignment of Hsh155p/SF3B1 from human to budding yeast *S. cerevisiae*

The sequences of Hsh155p/SF3B1 from 8 different organisms including *H. sapiens* and *S. cerevisiae* were aligned using Clustal W method within MegAlign software (DNASTAR). Residues that exactly match the sequence of *H. sapiens* SF3B1, are colored in blue. Seven conserved SF3B1 residues that are frequently mutated in human diseases (MDS & CLL) are indicated in red.

### Figure S2. *hsh155* alleles tested in this study show no detectable grow defects

(A) Selected *hsh155* alleles from yeast genetic screens with increased splicing activity of BS mutant reporters

(B) Selected *hsh155* alleles from disease-mutant residues with inhibited splicing activity of BS mutant reporters.

### Figure S3. *In vivo* interactions between Prp5p and Hsh155p & U4/5/6 snRNAs.

(A) All of the tested Hsh155p mutants that enhanced *in vitro* Prp5p-interaction show decreased *in vivo* affinity with Prp5p at various levels.

(B) Mutant Hsh155p proteins exhibit unaffected interaction within the SF3B complex, indicated by a SF3B subunit, Cus1p/SF3B2.

(C) Prp5p's association of U4, U5 and U6 snRNAs are not affected by *hsh155* mutants.

(D) In the presence of *hsh155*-L313S or -H331R allele, Prp5p co-immunoprecipitated much

less pre-mRNA of WT reporter, whereas Prp5's association with pre-mRNA of BS-U257C mutant reporter is partly restored. However, in the presence of *hsh155*-H331D or -K335N allele, Prp5's association with pre-mRNA, either WT or BS-U257C mutant reporter, is not obvious changed.

\*:  $p < 0.05$ , \*\*:  $p < 0.01$ .

**Figure S4. Localization of *hsh155* mutant residues in the structure of spliceosomal B<sup>act</sup> complex**

Locations of identified mutated residues of Hsh155p/SF3B1 in this study are indicated in pink and shown in the recently solved cryo-EM B<sup>act</sup> structure (from Yan et al. 2016). Prp5p-direct-interacting HEAT repeats 4-9 of Hsh155p are labeled, which shows a tight holding of ribonucleotides close to downstream of branch site region.

**Table S1. Recombinant proteins used in this study**

**Table S2. Yeast strains used in this study**

**Table S3. Primers used in RT-qPCR**

**Table S4. *hsh155* mutants derived from our yeast genetic screens that are also found in human diseases**

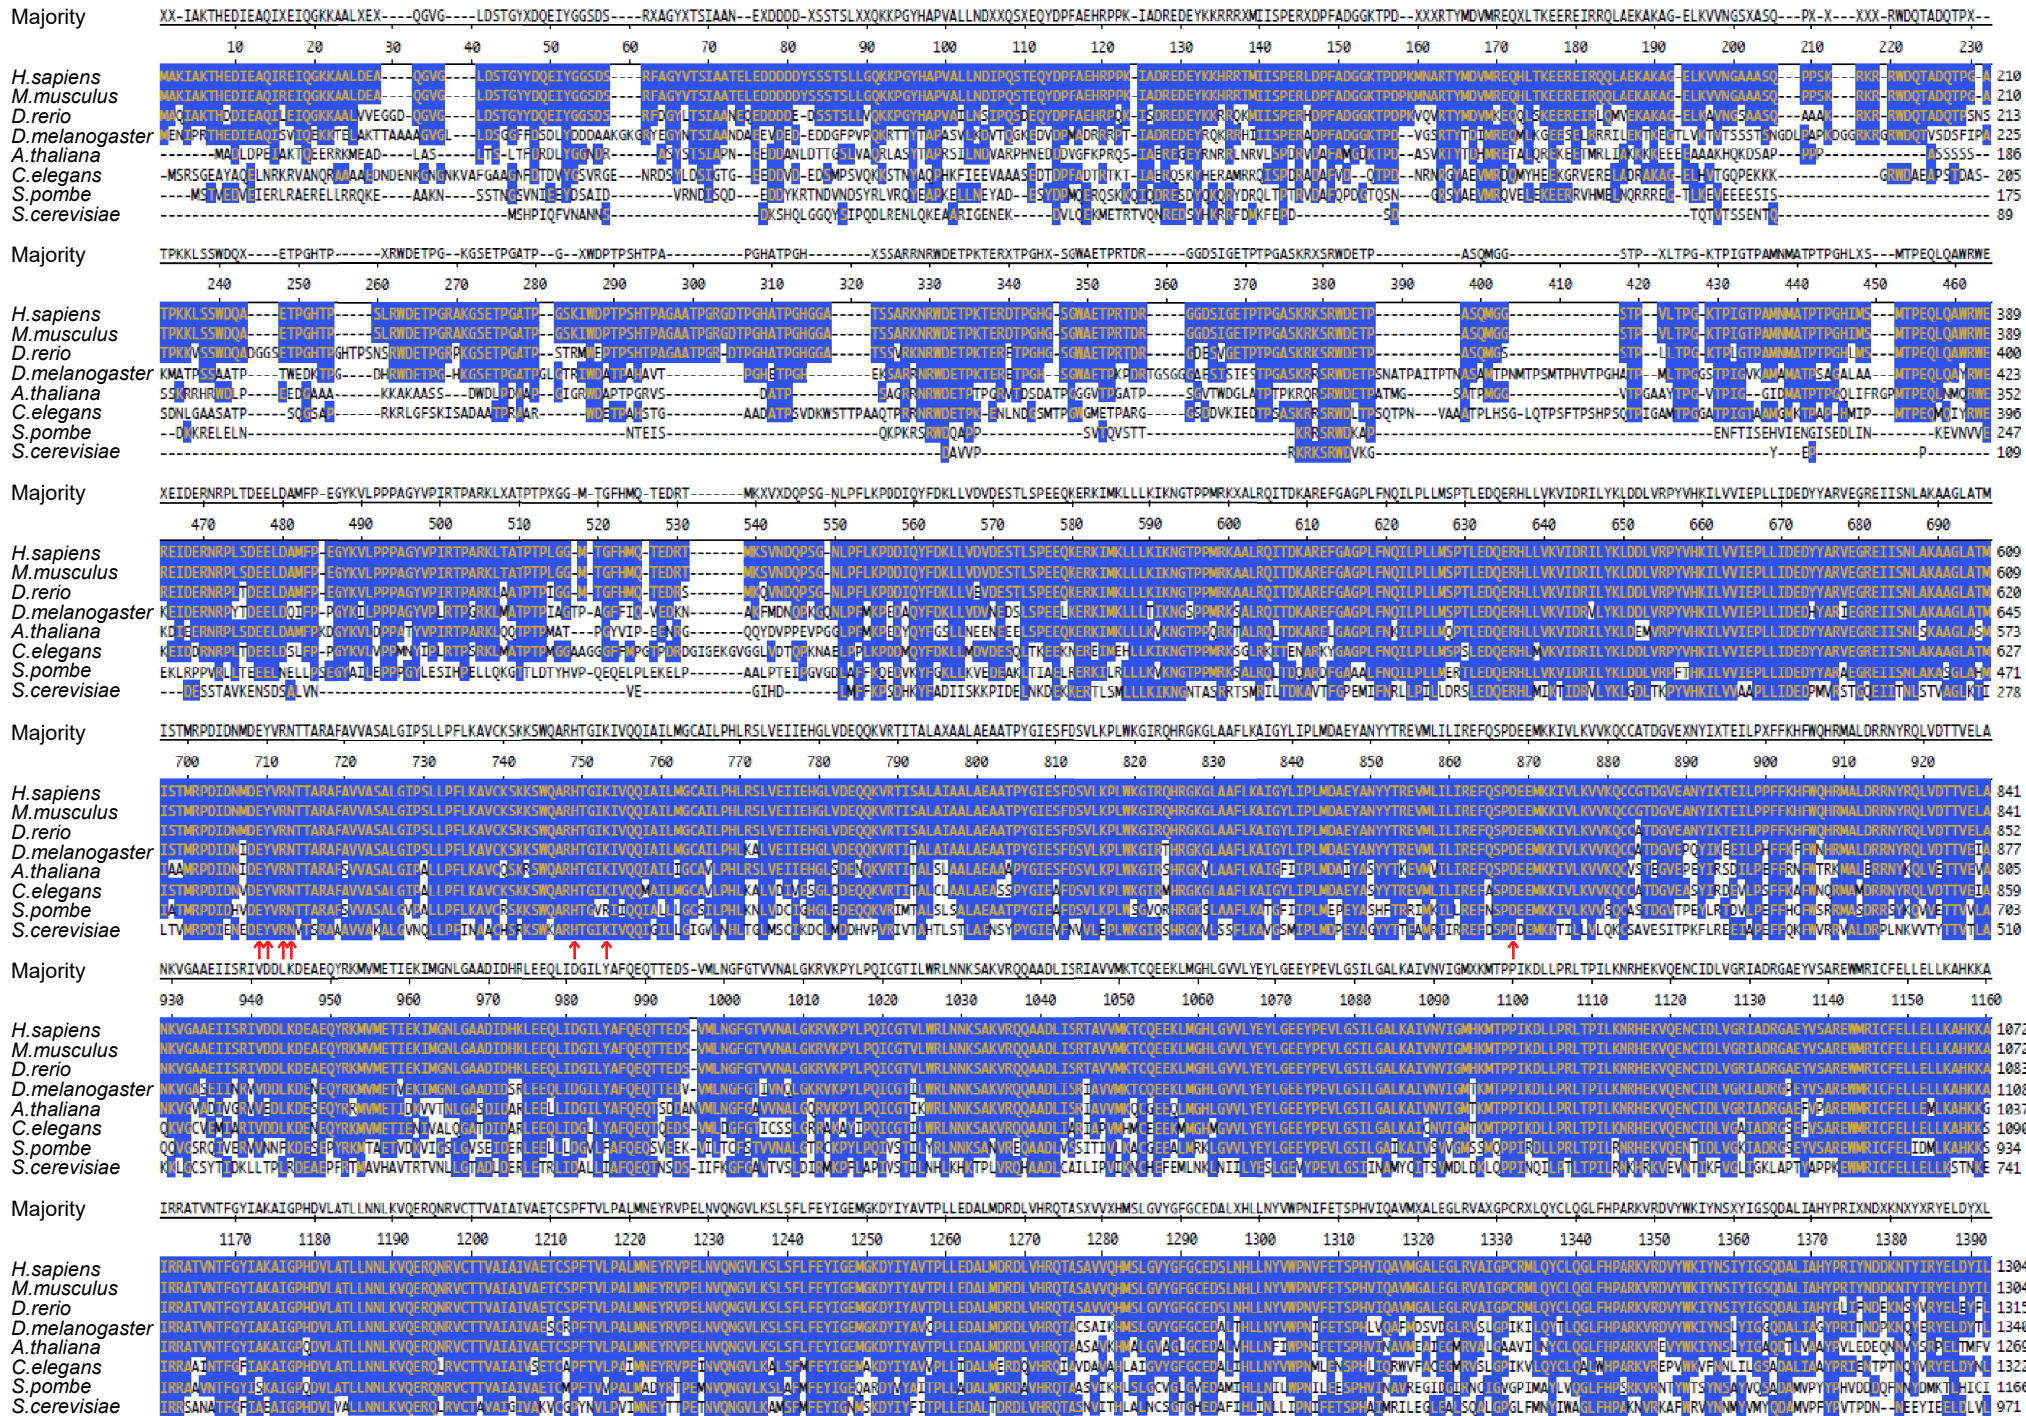

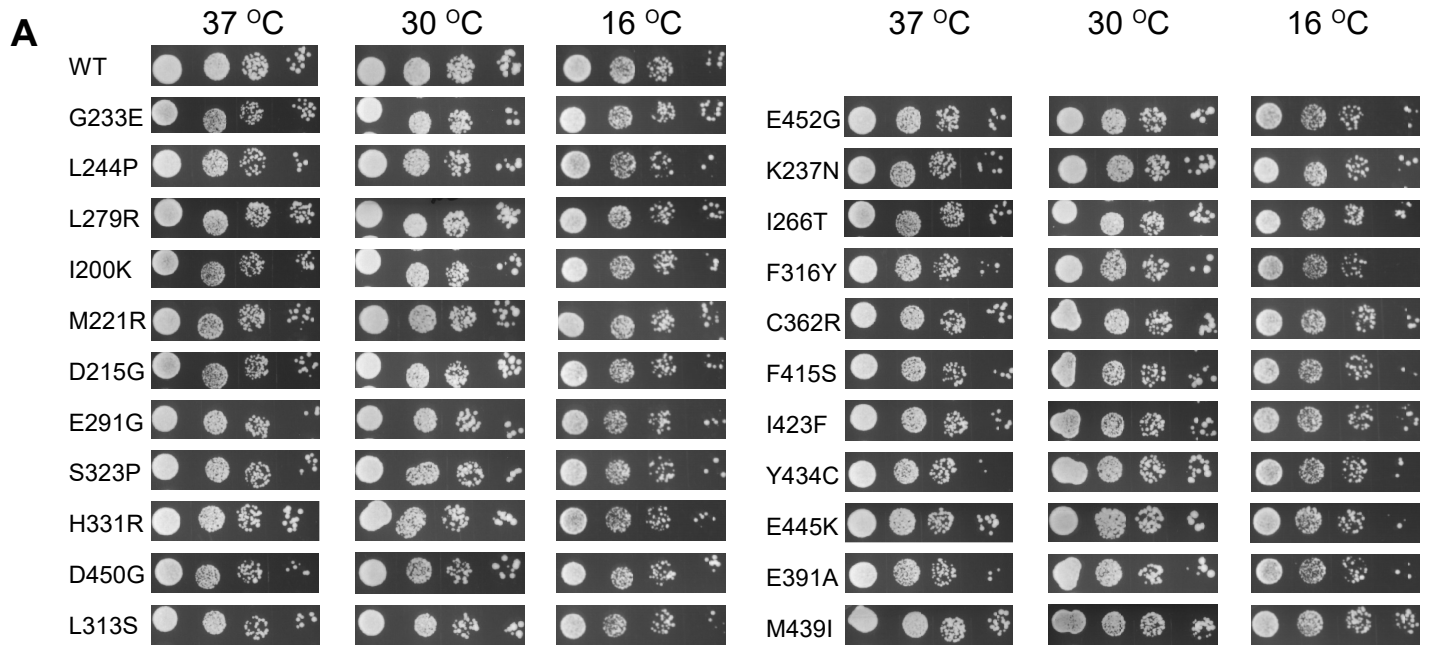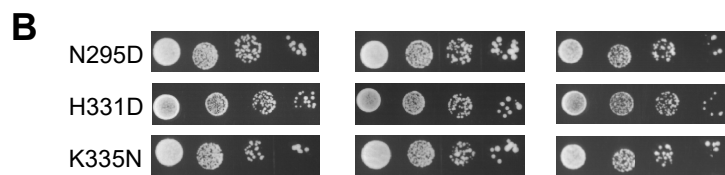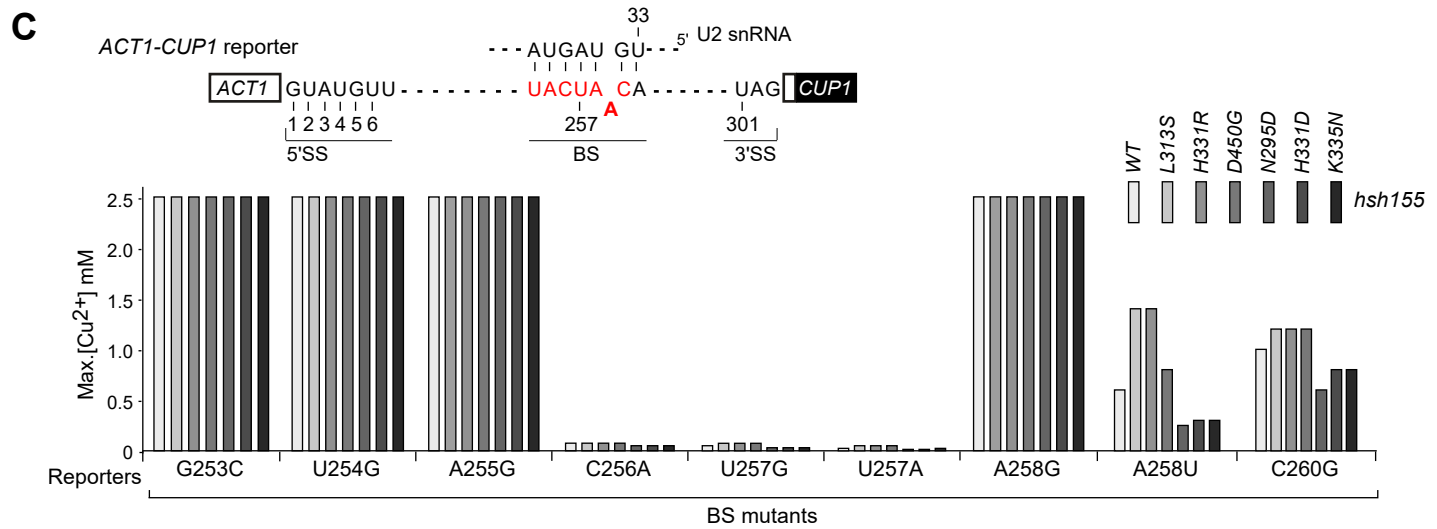

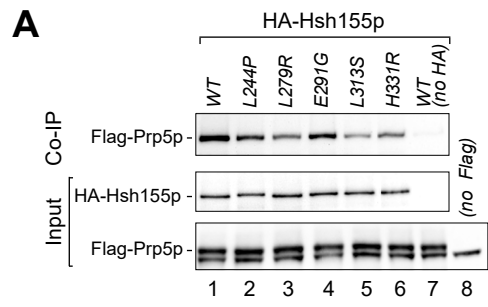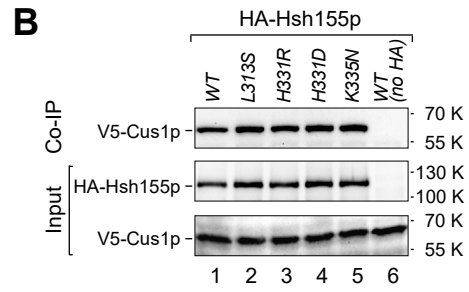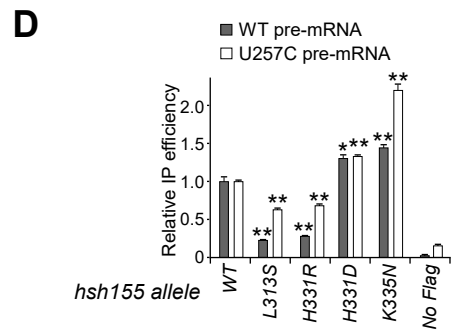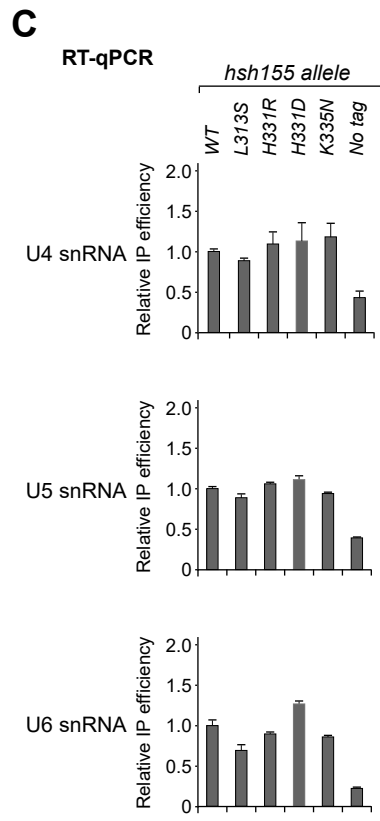

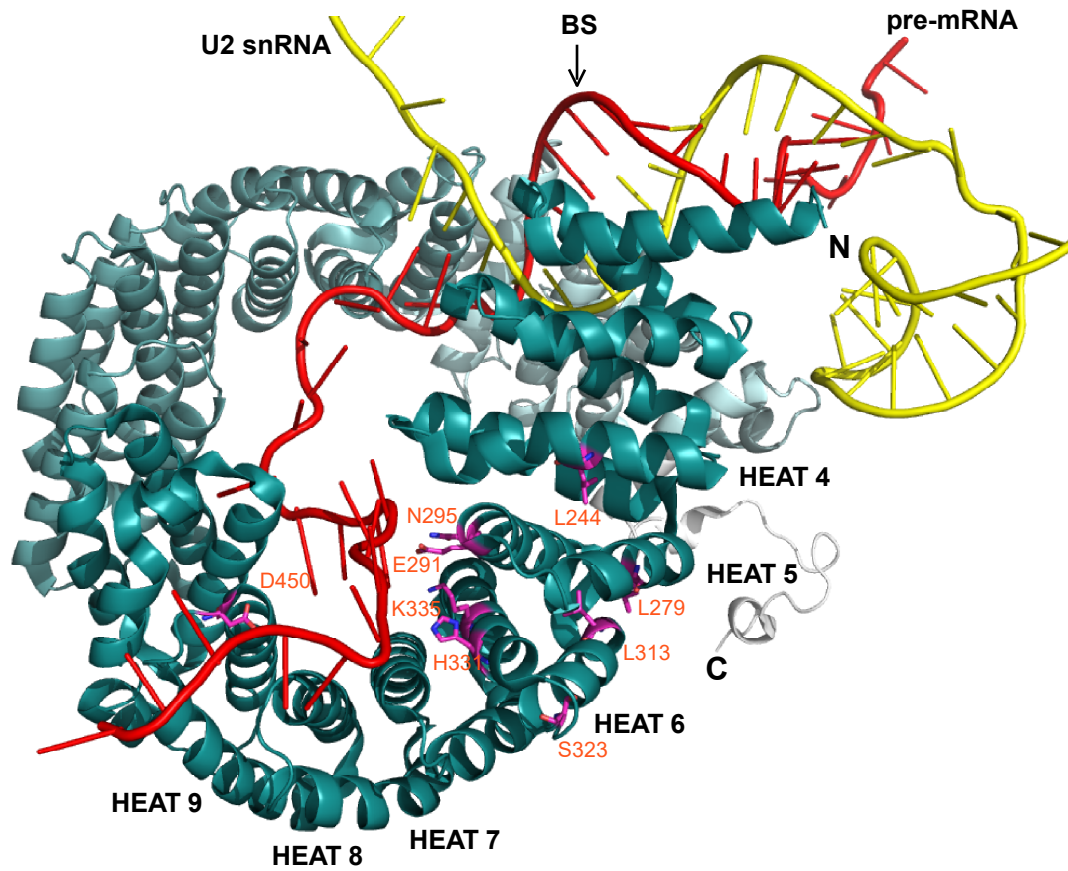

**Table S1: Recombinant proteins used in this study**

| <b>Proteins</b>              | <b>Coverage of amino acids</b>                         |
|------------------------------|--------------------------------------------------------|
| Hsh155p-N                    | 1-127 aa                                               |
| Hsh155p-HEATs 1-8            | 122-434 aa                                             |
| Hsh155p-HEATs 5-12           | 271-592 aa                                             |
| Hsh155p-HEATs 9-16           | 425-761 aa                                             |
| Hsh155p-HEATs 13-20          | 589-911 aa                                             |
| Hsh155p-HEATs 17-22          | 755-971 aa                                             |
| Hsh155p-HEATs 1-4            | 122-276 aa                                             |
| Hsh155p-HEATs 5-8            | 271-434 aa                                             |
| Hsh155p-HEATs 9-12           | 425-592 aa                                             |
| Hsh155p-HEATs 13-16          | 589-761 aa                                             |
| Hsh155p-HEATs 3-6            | 196-343 aa                                             |
| Hsh155p-HEATs 1-5            | 122-308 aa                                             |
| Hsh155p-HEATs 1-6            | 122-343 aa                                             |
| Hsh155p-HEATs 1-12           | 122-592 aa                                             |
| Prp5p-FL                     | 1-849 aa                                               |
| Prp5p- $\Delta$ N            | 206-849 aa                                             |
| Prp5p- $\Delta$ C            | 1-698 aa                                               |
| Prp5p- $\Delta$ N $\Delta$ C | 206-698 aa                                             |
| Prp5p- <u>APLD</u>           | 1-849 aa (D137A)                                       |
| Prp5p- <u>AAAA</u>           | 1-849 aa ( <sub>137</sub> DPLD <sub>140</sub> to AAAA) |

Notes: All the Hsh155p recombinant proteins are GST tagged at their N-terminus; all the Prp5p recombinant proteins are 6xHis tagged at their N-terminus.

**Table S2: Yeast strains used in this study**

| <b><i>S. cerevisiae</i> strains</b> | <b>Genotype</b>                                                                                                                                                 |
|-------------------------------------|-----------------------------------------------------------------------------------------------------------------------------------------------------------------|
| yTQ01                               | <i>MATa ade2 cup1Δ:: ura3 his3 hsh155Δ:: loxP leu2 lys2 prp5Δ:: loxP trp1</i> pRS314-Prp5[ <i>PRP5 TRP1</i> CEN ARS] pRS316-Hsh155[ <i>HSH155 URA2</i> CEN ARS] |
| <i>hsh155</i> mutants               | Constructed from yTQ01; <i>hsh155</i> alleles were cloned into pRS317-LYS vector, and the WT pRS316-Hsh155 plasmid was removed using 5-FOA                      |
| <i>prp5</i> mutants                 | Constructed from yTQ01; <i>prp5</i> alleles were cloned into pRS314-Trp, and introduced into the yeast strain by two-steps plasmid shuffling                    |
| V5-Cus1                             | Constructed from <i>hsh155</i> mutant strains, in which a pRS316-V5-Cus1 was introduced                                                                         |

Notes: Derived from the yTQ01 strain, other yeast strains were generated either by plasmid shuffling to lose WT sequence-containing plasmids, such as *hsh155* and *prp5* mutants (with/without tag), or by direct transformation of extract copy of gene, such as V5-Cus1.



**Table S3: Primers used in the RT-qPCR**

| <b>Primers</b> | <b>Sequences</b>               | <b>Genes</b> |
|----------------|--------------------------------|--------------|
| TQ368-S        | 5'-TCTTTTATTTGCTACTGTGTCTCATGT | ACT1-CUP1    |
| TQ369-AS       | 5'-TTAATTCGCTGAACCCGGTA        |              |
| TQ387-S        | 5'-GGAGATCAAGAAGTCCTACTG       | U1 snRNA     |
| TQ388-AS       | 5'-GTGTGTGACCAAGGAGTTTGC       |              |
| TQ434-S        | 5'-AGCCATGACTGCATCTGTTGTT      | U2 snRNA     |
| TQ435-AS       | 5'-CAACCATCAAGTCCGTTTCTTG      |              |
| TQ438-S        | 5'-ACGGGAAATACGCATATCAGTG      | U4 snRNA     |
| TQ421-AS       | 5'-GAACACCGAATTGACCATGAG       |              |
| TQ389-S        | 5'-GCAGCTTTACAGATCAATGG        | U5 snRNA     |
| TQ390-AS       | 5'-GGACAGCTTTACCTGTTTCTATGG    |              |
| TQ393-S        | 5'-GTTGCGGAAGTAACCCTTCG        | U6 snRNA     |
| TQ394-AS       | 5'-AACGAAATAAATCTCTTTGTAAAACGG |              |
| TQ410-S        | 5'-GGTGGTCTCCTCTGACTTCAACA     | GAPDH        |
| TQ411-AS       | 5'-GTTGCTGTAGCCAAATTCGTTGT     |              |

**Table S4. *hsh155* mutants derived from genetic screens that are also found in human diseases**

|                                       | <i>hsh155</i> alleles | Positions in human SF3B1 | In MDS or CLL  | In other cancers (TCGA database)                | In HEAT motifs | Max [Cu <sup>2+</sup> ] mM |
|---------------------------------------|-----------------------|--------------------------|----------------|-------------------------------------------------|----------------|----------------------------|
| <b>From UV screening</b>              | WT                    |                          |                |                                                 |                | 0.25                       |
|                                       | L735S                 | L1066                    |                |                                                 | 16-helixA      | 0.8                        |
|                                       | L732S                 | L1063                    |                |                                                 | 16-helixA      | 0.8                        |
|                                       | E468K                 | D799                     |                |                                                 | 9-helixB       | 0.7                        |
|                                       | L229P                 | L560                     |                |                                                 | 3-helixB       | 0.5                        |
| <b>From error-prone PCR screening</b> | WT                    |                          |                |                                                 |                | 0.25                       |
|                                       | G233E                 | D564                     |                |                                                 | 3-helixB       | 0.8                        |
|                                       | L244P                 | L575                     |                |                                                 | 4-helixA       | 0.8                        |
|                                       | L279R                 | I610                     |                |                                                 | 5-helixA       | 0.8                        |
|                                       | I200K                 | L531                     |                |                                                 | 3-helixA       | 0.6                        |
|                                       | M221R                 | L552                     |                |                                                 | 3-helixB       | 0.6                        |
|                                       | D215G                 | D546                     |                |                                                 | 3-turn         | 0.6                        |
|                                       | E291G                 | E622                     | E622D          | Breast cancer (E622Q)                           | 5-turn         | 0.6                        |
|                                       | S323P                 | S654                     |                |                                                 | 6-turn         | 0.6                        |
|                                       | H331R                 | H662                     | H662Q/D/Y      | Uveal melanoma (H662R); Prostate cancer (H662Q) | 6-helixB       | 0.6                        |
|                                       | D450G                 | D781                     | D781G          | Breast cancer (D781E)                           | 9-turn         | 0.6                        |
|                                       | L313S                 | L644                     |                |                                                 | 6-helixA       | 0.5                        |
|                                       | E452G                 | E783                     |                |                                                 | 9-turn         | 0.5                        |
|                                       | K237N                 | R568                     |                | Colorectal cancer (R568C)                       | 3-linker       | 0.4                        |
|                                       | I266T                 | I597                     |                |                                                 | 4-helixB       | 0.4                        |
|                                       | F316Y                 | F647                     |                |                                                 | 6-helixA       | 0.4                        |
|                                       | C362R                 | G693                     |                |                                                 | 7-turn         | 0.4                        |
|                                       | F415S                 | F764                     |                |                                                 | 8-helixB       | 0.4                        |
|                                       | I423F                 | I754                     |                |                                                 | 8-helixB       | 0.4                        |
|                                       | Y434C                 | Y765                     |                | Breast cancer (Y765C); Breast cancer (Y765H)    | 8-linker       | 0.4                        |
| E445K                                 | E776                  |                          |                | 9-helixA                                        | 0.4            |                            |
| E391A                                 | E722                  |                          | NCI-60 (E722K) | 7-linker                                        | 0.3            |                            |
| M439I                                 | M770                  |                          |                | 9-helixA                                        | 0.3            |                            |
